# Supplementary material
Source: publisher figshare collection journal article supplement (https://acs.figshare.com/ndownloader/files/4465345)
Supplement: Supplementary file 1 [file 4465345]

 
data_p-1 
  
_audit_creation_method            SHELXL-97 
_chemical_name_systematic 
; 
 ? 
; 
_chemical_name_common             ? 
_chemical_melting_point           ? 
_chemical_formula_moiety          ? 
_chemical_formula_sum 
 'C26 H26 N2 O3' 
_chemical_formula_weight          414.49 
  
loop_ 
 _atom_type_symbol 
 _atom_type_description 
 _atom_type_scat_dispersion_real 
 _atom_type_scat_dispersion_imag 
 _atom_type_scat_source 
 'C'  'C'   0.0033   0.0016 
 'International Tables Vol C Tables 4.2.6.8 and 6.1.1.4' 
 'H'  'H'   0.0000   0.0000 
 'International Tables Vol C Tables 4.2.6.8 and 6.1.1.4' 
 'N'  'N'   0.0061   0.0033 
 'International Tables Vol C Tables 4.2.6.8 and 6.1.1.4' 
 'O'  'O'   0.0106   0.0060 
 'International Tables Vol C Tables 4.2.6.8 and 6.1.1.4' 
  
_symmetry_cell_setting            Triclinic 
_symmetry_space_group_name_H-M    P-1 
  
loop_ 
 _symmetry_equiv_pos_as_xyz 
 'x, y, z' 
 '-x, -y, -z' 
  
_cell_length_a                    8.9828(9) 
_cell_length_b                    10.4604(10) 
_cell_length_c                    12.0419(11) 
_cell_angle_alpha                 84.888(2) 
_cell_angle_beta                  80.135(2) 
_cell_angle_gamma                 82.659(2) 
_cell_volume                      1103.02(18) 
_cell_formula_units_Z             2 
_cell_measurement_temperature     296(2) 
_cell_measurement_reflns_used     1258 
_cell_measurement_theta_min       2.52 
_cell_measurement_theta_max       22.42 
  
_exptl_crystal_description        ? 
_exptl_crystal_colour             ? 
_exptl_crystal_size_max           0.29 
_exptl_crystal_size_mid           0.22 
_exptl_crystal_size_min           0.20 
_exptl_crystal_density_meas       ? 
_exptl_crystal_density_diffrn     1.248 
_exptl_crystal_density_method     'not measured' 
_exptl_crystal_F_000              440 
_exptl_absorpt_coefficient_mu     0.082 
_exptl_absorpt_correction_type    multi-scan 
_exptl_absorpt_correction_T_min   0.9766 
_exptl_absorpt_correction_T_max   0.9838 
_exptl_absorpt_process_details    ? 
  
_exptl_special_details 
; 
 ? 
; 
  
_diffrn_ambient_temperature       296(2) 
_diffrn_radiation_wavelength      0.71073 
_diffrn_radiation_type            MoK\a 
_diffrn_radiation_source          'fine-focus sealed tube' 
_diffrn_radiation_monochromator   graphite 
_diffrn_measurement_device_type   'Bruker APEX-II CCD' 
_diffrn_measurement_method        '\f and \w scans' 
_diffrn_detector_area_resol_mean  ? 
_diffrn_reflns_number             6011 
_diffrn_reflns_av_R_equivalents   0.0186 
_diffrn_reflns_av_sigmaI/netI     0.0404 
_diffrn_reflns_limit_h_min        -10 
_diffrn_reflns_limit_h_max        9 
_diffrn_reflns_limit_k_min        -12 
_diffrn_reflns_limit_k_max        11 
_diffrn_reflns_limit_l_min        -12 
_diffrn_reflns_limit_l_max        14 
_diffrn_reflns_theta_min          1.72 
_diffrn_reflns_theta_max          25.50 
_reflns_number_total              4067 
_reflns_number_gt                 2617 
_reflns_threshold_expression      >2sigma(I) 
  
_computing_data_collection        'Bruker APEX2' 
_computing_cell_refinement        'Bruker SAINT' 
_computing_data_reduction         'Bruker SAINT' 
_computing_structure_solution     'SHELXS-97 (Sheldrick, 2008)' 
_computing_structure_refinement   'SHELXL-97 (Sheldrick, 2008)' 
_computing_molecular_graphics     'Bruker SHELXTL' 
_computing_publication_material   'Bruker SHELXTL' 
  
_refine_special_details 
; 
 Refinement of F^2^ against ALL reflections.  The weighted R-factor wR and 
 goodness of fit S are based on F^2^, conventional R-factors R are based 
 on F, with F set to zero for negative F^2^. The threshold expression of 
 F^2^ > 2sigma(F^2^) is used only for calculating R-factors(gt) etc. and is 
 not relevant to the choice of reflections for refinement.  R-factors based 
 on F^2^ are statistically about twice as large as those based on F, and R- 
 factors based on ALL data will be even larger. 
; 
  
_refine_ls_structure_factor_coef  Fsqd 
_refine_ls_matrix_type            full 
_refine_ls_weighting_scheme       calc 
_refine_ls_weighting_details 
 'calc w=1/[\s^2^(Fo^2^)+(0.0699P)^2^+0.0000P] where P=(Fo^2^+2Fc^2^)/3' 
_atom_sites_solution_primary      direct 
_atom_sites_solution_secondary    difmap 
_atom_sites_solution_hydrogens    geom 
_refine_ls_hydrogen_treatment     constr 
_refine_ls_extinction_method      SHELXL 
_refine_ls_extinction_coef        0.025(4) 
_refine_ls_extinction_expression 
 'Fc^*^=kFc[1+0.001xFc^2^\l^3^/sin(2\q)]^-1/4^' 
_refine_ls_number_reflns          4067 
_refine_ls_number_parameters      281 
_refine_ls_number_restraints      0 
_refine_ls_R_factor_all           0.0813 
_refine_ls_R_factor_gt            0.0490 
_refine_ls_wR_factor_ref          0.1435 
_refine_ls_wR_factor_gt           0.1218 
_refine_ls_goodness_of_fit_ref    1.055 
_refine_ls_restrained_S_all       1.055 
_refine_ls_shift/su_max           0.000 
_refine_ls_shift/su_mean          0.000 
  
loop_ 
 _atom_site_label 
 _atom_site_type_symbol 
 _atom_site_fract_x 
 _atom_site_fract_y 
 _atom_site_fract_z 
 _atom_site_U_iso_or_equiv 
 _atom_site_adp_type 
 _atom_site_occupancy 
 _atom_site_symmetry_multiplicity 
 _atom_site_calc_flag 
 _atom_site_refinement_flags 
 _atom_site_disorder_assembly 
 _atom_site_disorder_group 
C1 C -0.1138(2) 0.33640(19) 0.36265(17) 0.0522(5) Uani 1 1 d . . . 
C6 C -0.0473(3) 0.2790(2) 0.45258(18) 0.0582(6) Uani 1 1 d . . . 
H6 H 0.0283 0.3177 0.4764 0.070 Uiso 1 1 calc R . . 
C3 C -0.2686(3) 0.1620(2) 0.3855(2) 0.0645(6) Uani 1 1 d . . . 
H3 H -0.3441 0.1224 0.3625 0.077 Uiso 1 1 calc R . . 
C2 C -0.2253(3) 0.2756(2) 0.32971(17) 0.0589(6) Uani 1 1 d . . . 
H2 H -0.2718 0.3118 0.2691 0.071 Uiso 1 1 calc R . . 
C5 C -0.0912(3) 0.1652(2) 0.50763(17) 0.0619(6) Uani 1 1 d . . . 
H5 H -0.0450 0.1279 0.5681 0.074 Uiso 1 1 calc R . . 
C4 C -0.2014(3) 0.1073(2) 0.4741(2) 0.0640(6) Uani 1 1 d . . . 
H4 H -0.2308 0.0306 0.5115 0.077 Uiso 1 1 calc R . . 
C7 C -0.1541(2) 0.69882(17) 0.28187(15) 0.0411(5) Uani 1 1 d . . . 
C12 C -0.1717(2) 0.58068(18) 0.34243(17) 0.0492(5) Uani 1 1 d . . . 
C11 C -0.2833(3) 0.5776(2) 0.43796(19) 0.0614(6) Uani 1 1 d . . . 
H11 H -0.2962 0.4994 0.4795 0.074 Uiso 1 1 calc R . . 
C8 C -0.2463(2) 0.80857(19) 0.31720(18) 0.0552(6) Uani 1 1 d . . . 
H8 H -0.2339 0.8875 0.2767 0.066 Uiso 1 1 calc R . . 
C10 C -0.3747(3) 0.6870(2) 0.47248(19) 0.0637(6) Uani 1 1 d . . . 
H10 H -0.4486 0.6825 0.5366 0.076 Uiso 1 1 calc R . . 
C9 C -0.3567(3) 0.8024(2) 0.4122(2) 0.0643(6) Uani 1 1 d . . . 
H9 H -0.4186 0.8768 0.4350 0.077 Uiso 1 1 calc R . . 
C13 C -0.0691(3) 0.4614(2) 0.3036(2) 0.0795(8) Uani 1 1 d . . . 
H13A H -0.0675 0.4574 0.2232 0.095 Uiso 1 1 calc R . . 
H13B H 0.0336 0.4701 0.3144 0.095 Uiso 1 1 calc R . . 
O3 O 0.07764(14) 0.87949(11) 0.21290(10) 0.0460(4) Uani 1 1 d . . . 
N2 N -0.03915(17) 0.70159(14) 0.18238(12) 0.0413(4) Uani 1 1 d . . . 
C18 C 0.1009(2) 0.74095(16) 0.19882(15) 0.0379(4) Uani 1 1 d . . . 
H18 H 0.1295 0.6960 0.2683 0.045 Uiso 1 1 calc R . . 
C22 C 0.2036(2) 0.94378(17) 0.20283(15) 0.0412(5) Uani 1 1 d . . . 
C20 C 0.3760(2) 0.75371(17) 0.12251(16) 0.0455(5) Uani 1 1 d . . . 
H20 H 0.4482 0.7516 0.0516 0.055 Uiso 1 1 calc R . . 
C19 C 0.2279(2) 0.70890(17) 0.10163(15) 0.0410(5) Uani 1 1 d . . . 
H19 H 0.2441 0.6147 0.0987 0.049 Uiso 1 1 calc R . . 
C21 C 0.3484(2) 0.89053(18) 0.15806(15) 0.0442(5) Uani 1 1 d . . . 
C14 C 0.1807(2) 0.7664(2) -0.00950(15) 0.0529(5) Uani 1 1 d . . . 
H14A H 0.1711 0.8599 -0.0112 0.063 Uiso 1 1 calc R . . 
H14B H 0.2582 0.7388 -0.0719 0.063 Uiso 1 1 calc R . . 
C24 C 0.1772(3) 1.06880(18) 0.23780(17) 0.0529(5) Uani 1 1 d . . . 
H24 H 0.0793 1.1029 0.2678 0.063 Uiso 1 1 calc R . . 
C27 C 0.4664(2) 0.9677(2) 0.14820(19) 0.0598(6) Uani 1 1 d . . . 
H27 H 0.5646 0.9347 0.1178 0.072 Uiso 1 1 calc R . . 
C16 C -0.0916(2) 0.7573(2) 0.07710(16) 0.0576(6) Uani 1 1 d . . . 
H16A H -0.1121 0.8505 0.0789 0.069 Uiso 1 1 calc R . . 
H16B H -0.1850 0.7237 0.0698 0.069 Uiso 1 1 calc R . . 
C15 C 0.0297(3) 0.7229(2) -0.02248(17) 0.0638(6) Uani 1 1 d . . . 
H15A H -0.0020 0.7640 -0.0914 0.077 Uiso 1 1 calc R . . 
H15B H 0.0423 0.6301 -0.0284 0.077 Uiso 1 1 calc R . . 
C25 C 0.2957(3) 1.1421(2) 0.2281(2) 0.0643(6) Uani 1 1 d . . . 
H25 H 0.2784 1.2255 0.2522 0.077 Uiso 1 1 calc R . . 
C26 C 0.4403(3) 1.0919(2) 0.1826(2) 0.0673(7) Uani 1 1 d . . . 
H26 H 0.5205 1.1419 0.1750 0.081 Uiso 1 1 calc R . . 
C28 C 0.4488(2) 0.66691(19) 0.21311(19) 0.0570(6) Uani 1 1 d . . . 
H28A H 0.5359 0.7043 0.2285 0.068 Uiso 1 1 calc R . . 
H28B H 0.3759 0.6632 0.2825 0.068 Uiso 1 1 calc R . . 
N1 N 0.4983(3) 0.5343(2) 0.1772(3) 0.0858(7) Uani 1 1 d . . . 
O2 O 0.4305(3) 0.4483(2) 0.2251(3) 0.1528(12) Uani 1 1 d . . . 
O1 O 0.6047(3) 0.5208(2) 0.1003(3) 0.1357(10) Uani 1 1 d . . . 
  
loop_ 
 _atom_site_aniso_label 
 _atom_site_aniso_U_11 
 _atom_site_aniso_U_22 
 _atom_site_aniso_U_33 
 _atom_site_aniso_U_23 
 _atom_site_aniso_U_13 
 _atom_site_aniso_U_12 
C1 0.0569(14) 0.0425(11) 0.0482(12) -0.0060(9) 0.0100(10) 0.0051(10) 
C6 0.0623(15) 0.0564(13) 0.0578(14) -0.0173(11) -0.0089(11) -0.0052(11) 
C3 0.0567(14) 0.0591(14) 0.0786(16) -0.0204(13) -0.0083(13) -0.0020(12) 
C2 0.0609(15) 0.0638(14) 0.0470(12) -0.0075(11) -0.0107(11) 0.0166(12) 
C5 0.0815(17) 0.0551(14) 0.0450(12) -0.0017(10) -0.0108(12) 0.0077(12) 
C4 0.0709(17) 0.0469(13) 0.0679(15) -0.0020(11) 0.0033(13) -0.0041(12) 
C7 0.0329(10) 0.0453(11) 0.0459(11) -0.0092(9) -0.0029(8) -0.0077(9) 
C12 0.0472(12) 0.0432(11) 0.0522(12) -0.0058(9) 0.0051(10) -0.0019(9) 
C11 0.0626(14) 0.0498(13) 0.0627(14) -0.0036(11) 0.0158(11) -0.0070(11) 
C8 0.0464(12) 0.0426(12) 0.0731(15) -0.0082(10) 0.0034(11) -0.0066(10) 
C10 0.0582(14) 0.0602(14) 0.0663(14) -0.0172(12) 0.0169(11) -0.0104(12) 
C9 0.0525(14) 0.0494(13) 0.0847(16) -0.0218(12) 0.0123(12) -0.0024(11) 
C13 0.0864(19) 0.0455(13) 0.0849(17) 0.0037(12) 0.0339(14) 0.0050(12) 
O3 0.0383(8) 0.0412(7) 0.0571(8) -0.0107(6) 0.0022(6) -0.0079(6) 
N2 0.0366(9) 0.0470(9) 0.0412(9) -0.0051(7) -0.0051(7) -0.0082(7) 
C18 0.0376(10) 0.0354(10) 0.0399(10) -0.0012(8) -0.0049(8) -0.0041(8) 
C22 0.0430(11) 0.0387(10) 0.0415(10) -0.0003(8) -0.0035(9) -0.0095(9) 
C20 0.0355(11) 0.0495(12) 0.0485(11) -0.0036(9) 0.0018(9) -0.0050(9) 
C19 0.0410(11) 0.0371(10) 0.0432(11) -0.0055(8) -0.0024(9) -0.0016(8) 
C21 0.0411(11) 0.0461(11) 0.0448(11) 0.0023(9) -0.0045(9) -0.0094(9) 
C14 0.0513(13) 0.0638(13) 0.0398(11) -0.0036(10) 0.0015(9) -0.0046(10) 
C24 0.0606(14) 0.0397(11) 0.0575(13) -0.0035(9) -0.0040(11) -0.0101(10) 
C27 0.0458(13) 0.0643(15) 0.0692(14) 0.0056(12) -0.0064(11) -0.0168(11) 
C16 0.0442(12) 0.0808(15) 0.0510(12) -0.0032(11) -0.0164(10) -0.0077(11) 
C15 0.0622(15) 0.0891(17) 0.0431(12) -0.0053(12) -0.0146(11) -0.0114(13) 
C25 0.0787(18) 0.0454(12) 0.0713(15) -0.0031(11) -0.0116(13) -0.0183(12) 
C26 0.0692(17) 0.0597(15) 0.0786(16) 0.0049(12) -0.0143(13) -0.0322(13) 
C28 0.0429(12) 0.0528(13) 0.0754(15) -0.0040(11) -0.0140(11) 0.0000(10) 
N1 0.0769(17) 0.0568(15) 0.132(2) -0.0038(15) -0.0510(16) 0.0040(13) 
O2 0.173(3) 0.0654(14) 0.238(3) 0.0311(17) -0.086(2) -0.0381(16) 
O1 0.115(2) 0.1120(18) 0.174(2) -0.0615(17) -0.0175(18) 0.0375(15) 
  
_geom_special_details 
; 
 All esds (except the esd in the dihedral angle between two l.s. planes) 
 are estimated using the full covariance matrix.  The cell esds are taken 
 into account individually in the estimation of esds in distances, angles 
 and torsion angles; correlations between esds in cell parameters are only 
 used when they are defined by crystal symmetry.  An approximate (isotropic) 
 treatment of cell esds is used for estimating esds involving l.s. planes. 
; 
  
loop_ 
 _geom_bond_atom_site_label_1 
 _geom_bond_atom_site_label_2 
 _geom_bond_distance 
 _geom_bond_site_symmetry_2 
 _geom_bond_publ_flag 
C1 C6 1.380(3) . ? 
C1 C2 1.382(3) . ? 
C1 C13 1.499(3) . ? 
C6 C5 1.379(3) . ? 
C6 H6 0.9300 . ? 
C3 C4 1.361(3) . ? 
C3 C2 1.379(3) . ? 
C3 H3 0.9300 . ? 
C2 H2 0.9300 . ? 
C5 C4 1.358(3) . ? 
C5 H5 0.9300 . ? 
C4 H4 0.9300 . ? 
C7 C8 1.381(3) . ? 
C7 C12 1.391(2) . ? 
C7 N2 1.442(2) . ? 
C12 C11 1.391(3) . ? 
C12 C13 1.513(3) . ? 
C11 C10 1.373(3) . ? 
C11 H11 0.9300 . ? 
C8 C9 1.382(3) . ? 
C8 H8 0.9300 . ? 
C10 C9 1.366(3) . ? 
C10 H10 0.9300 . ? 
C9 H9 0.9300 . ? 
C13 H13A 0.9700 . ? 
C13 H13B 0.9700 . ? 
O3 C22 1.371(2) . ? 
O3 C18 1.458(2) . ? 
N2 C18 1.423(2) . ? 
N2 C16 1.474(2) . ? 
C18 C19 1.516(2) . ? 
C18 H18 0.9800 . ? 
C22 C21 1.386(3) . ? 
C22 C24 1.389(3) . ? 
C20 C21 1.508(3) . ? 
C20 C19 1.532(2) . ? 
C20 C28 1.536(3) . ? 
C20 H20 0.9800 . ? 
C19 C14 1.522(2) . ? 
C19 H19 0.9800 . ? 
C21 C27 1.396(3) . ? 
C14 C15 1.521(3) . ? 
C14 H14A 0.9700 . ? 
C14 H14B 0.9700 . ? 
C24 C25 1.374(3) . ? 
C24 H24 0.9300 . ? 
C27 C26 1.378(3) . ? 
C27 H27 0.9300 . ? 
C16 C15 1.511(3) . ? 
C16 H16A 0.9700 . ? 
C16 H16B 0.9700 . ? 
C15 H15A 0.9700 . ? 
C15 H15B 0.9700 . ? 
C25 C26 1.377(3) . ? 
C25 H25 0.9300 . ? 
C26 H26 0.9300 . ? 
C28 N1 1.481(3) . ? 
C28 H28A 0.9700 . ? 
C28 H28B 0.9700 . ? 
N1 O2 1.200(3) . ? 
N1 O1 1.215(3) . ? 
  
loop_ 
 _geom_angle_atom_site_label_1 
 _geom_angle_atom_site_label_2 
 _geom_angle_atom_site_label_3 
 _geom_angle 
 _geom_angle_site_symmetry_1 
 _geom_angle_site_symmetry_3 
 _geom_angle_publ_flag 
C6 C1 C2 117.6(2) . . ? 
C6 C1 C13 121.5(2) . . ? 
C2 C1 C13 120.9(2) . . ? 
C5 C6 C1 121.0(2) . . ? 
C5 C6 H6 119.5 . . ? 
C1 C6 H6 119.5 . . ? 
C4 C3 C2 120.4(2) . . ? 
C4 C3 H3 119.8 . . ? 
C2 C3 H3 119.8 . . ? 
C3 C2 C1 120.9(2) . . ? 
C3 C2 H2 119.6 . . ? 
C1 C2 H2 119.6 . . ? 
C4 C5 C6 120.4(2) . . ? 
C4 C5 H5 119.8 . . ? 
C6 C5 H5 119.8 . . ? 
C5 C4 C3 119.7(2) . . ? 
C5 C4 H4 120.1 . . ? 
C3 C4 H4 120.1 . . ? 
C8 C7 C12 119.91(17) . . ? 
C8 C7 N2 122.12(17) . . ? 
C12 C7 N2 117.97(16) . . ? 
C7 C12 C11 118.07(18) . . ? 
C7 C12 C13 119.42(17) . . ? 
C11 C12 C13 122.50(18) . . ? 
C10 C11 C12 121.7(2) . . ? 
C10 C11 H11 119.1 . . ? 
C12 C11 H11 119.1 . . ? 
C7 C8 C9 120.70(19) . . ? 
C7 C8 H8 119.7 . . ? 
C9 C8 H8 119.7 . . ? 
C9 C10 C11 119.6(2) . . ? 
C9 C10 H10 120.2 . . ? 
C11 C10 H10 120.2 . . ? 
C10 C9 C8 119.9(2) . . ? 
C10 C9 H9 120.0 . . ? 
C8 C9 H9 120.0 . . ? 
C1 C13 C12 114.98(18) . . ? 
C1 C13 H13A 108.5 . . ? 
C12 C13 H13A 108.5 . . ? 
C1 C13 H13B 108.5 . . ? 
C12 C13 H13B 108.5 . . ? 
H13A C13 H13B 107.5 . . ? 
C22 O3 C18 118.06(13) . . ? 
C18 N2 C7 114.99(13) . . ? 
C18 N2 C16 114.22(15) . . ? 
C7 N2 C16 115.98(15) . . ? 
N2 C18 O3 108.26(14) . . ? 
N2 C18 C19 112.02(14) . . ? 
O3 C18 C19 110.77(14) . . ? 
N2 C18 H18 108.6 . . ? 
O3 C18 H18 108.6 . . ? 
C19 C18 H18 108.6 . . ? 
O3 C22 C21 123.04(16) . . ? 
O3 C22 C24 115.72(17) . . ? 
C21 C22 C24 121.22(18) . . ? 
C21 C20 C19 110.64(15) . . ? 
C21 C20 C28 108.62(16) . . ? 
C19 C20 C28 112.65(15) . . ? 
C21 C20 H20 108.3 . . ? 
C19 C20 H20 108.3 . . ? 
C28 C20 H20 108.3 . . ? 
C18 C19 C14 109.97(15) . . ? 
C18 C19 C20 110.22(14) . . ? 
C14 C19 C20 112.90(15) . . ? 
C18 C19 H19 107.9 . . ? 
C14 C19 H19 107.9 . . ? 
C20 C19 H19 107.9 . . ? 
C22 C21 C27 117.55(18) . . ? 
C22 C21 C20 120.65(16) . . ? 
C27 C21 C20 121.79(18) . . ? 
C15 C14 C19 110.20(16) . . ? 
C15 C14 H14A 109.6 . . ? 
C19 C14 H14A 109.6 . . ? 
C15 C14 H14B 109.6 . . ? 
C19 C14 H14B 109.6 . . ? 
H14A C14 H14B 108.1 . . ? 
C25 C24 C22 120.0(2) . . ? 
C25 C24 H24 120.0 . . ? 
C22 C24 H24 120.0 . . ? 
C26 C27 C21 121.3(2) . . ? 
C26 C27 H27 119.4 . . ? 
C21 C27 H27 119.4 . . ? 
N2 C16 C15 109.37(16) . . ? 
N2 C16 H16A 109.8 . . ? 
C15 C16 H16A 109.8 . . ? 
N2 C16 H16B 109.8 . . ? 
C15 C16 H16B 109.8 . . ? 
H16A C16 H16B 108.2 . . ? 
C16 C15 C14 111.02(16) . . ? 
C16 C15 H15A 109.4 . . ? 
C14 C15 H15A 109.4 . . ? 
C16 C15 H15B 109.4 . . ? 
C14 C15 H15B 109.4 . . ? 
H15A C15 H15B 108.0 . . ? 
C24 C25 C26 119.9(2) . . ? 
C24 C25 H25 120.1 . . ? 
C26 C25 H25 120.1 . . ? 
C25 C26 C27 120.1(2) . . ? 
C25 C26 H26 120.0 . . ? 
C27 C26 H26 120.0 . . ? 
N1 C28 C20 111.86(18) . . ? 
N1 C28 H28A 109.2 . . ? 
C20 C28 H28A 109.2 . . ? 
N1 C28 H28B 109.2 . . ? 
C20 C28 H28B 109.2 . . ? 
H28A C28 H28B 107.9 . . ? 
O2 N1 O1 124.8(3) . . ? 
O2 N1 C28 118.1(3) . . ? 
O1 N1 C28 117.2(3) . . ? 
  
loop_ 
 _geom_torsion_atom_site_label_1 
 _geom_torsion_atom_site_label_2 
 _geom_torsion_atom_site_label_3 
 _geom_torsion_atom_site_label_4 
 _geom_torsion 
 _geom_torsion_site_symmetry_1 
 _geom_torsion_site_symmetry_2 
 _geom_torsion_site_symmetry_3 
 _geom_torsion_site_symmetry_4 
 _geom_torsion_publ_flag 
C2 C1 C6 C5 -0.2(3) . . . . ? 
C13 C1 C6 C5 178.84(19) . . . . ? 
C4 C3 C2 C1 -0.3(3) . . . . ? 
C6 C1 C2 C3 0.3(3) . . . . ? 
C13 C1 C2 C3 -178.71(18) . . . . ? 
C1 C6 C5 C4 0.0(3) . . . . ? 
C6 C5 C4 C3 0.1(3) . . . . ? 
C2 C3 C4 C5 0.0(3) . . . . ? 
C8 C7 C12 C11 0.0(3) . . . . ? 
N2 C7 C12 C11 -179.55(18) . . . . ? 
C8 C7 C12 C13 -179.4(2) . . . . ? 
N2 C7 C12 C13 1.1(3) . . . . ? 
C7 C12 C11 C10 0.2(3) . . . . ? 
C13 C12 C11 C10 179.6(2) . . . . ? 
C12 C7 C8 C9 -0.3(3) . . . . ? 
N2 C7 C8 C9 179.21(19) . . . . ? 
C12 C11 C10 C9 -0.1(4) . . . . ? 
C11 C10 C9 C8 -0.3(4) . . . . ? 
C7 C8 C9 C10 0.4(3) . . . . ? 
C6 C1 C13 C12 -96.9(3) . . . . ? 
C2 C1 C13 C12 82.1(3) . . . . ? 
C7 C12 C13 C1 -170.3(2) . . . . ? 
C11 C12 C13 C1 10.4(4) . . . . ? 
C8 C7 N2 C18 82.5(2) . . . . ? 
C12 C7 N2 C18 -98.02(19) . . . . ? 
C8 C7 N2 C16 -54.5(2) . . . . ? 
C12 C7 N2 C16 125.04(19) . . . . ? 
C7 N2 C18 O3 -72.43(18) . . . . ? 
C16 N2 C18 O3 65.27(18) . . . . ? 
C7 N2 C18 C19 165.14(14) . . . . ? 
C16 N2 C18 C19 -57.2(2) . . . . ? 
C22 O3 C18 N2 -164.62(14) . . . . ? 
C22 O3 C18 C19 -41.43(19) . . . . ? 
C18 O3 C22 C21 13.5(2) . . . . ? 
C18 O3 C22 C24 -168.20(15) . . . . ? 
N2 C18 C19 C14 54.5(2) . . . . ? 
O3 C18 C19 C14 -66.46(18) . . . . ? 
N2 C18 C19 C20 179.62(14) . . . . ? 
O3 C18 C19 C20 58.64(18) . . . . ? 
C21 C20 C19 C18 -47.7(2) . . . . ? 
C28 C20 C19 C18 74.10(19) . . . . ? 
C21 C20 C19 C14 75.71(19) . . . . ? 
C28 C20 C19 C14 -162.50(16) . . . . ? 
O3 C22 C21 C27 177.52(16) . . . . ? 
C24 C22 C21 C27 -0.7(3) . . . . ? 
O3 C22 C21 C20 -3.0(3) . . . . ? 
C24 C22 C21 C20 178.80(17) . . . . ? 
C19 C20 C21 C22 20.9(2) . . . . ? 
C28 C20 C21 C22 -103.2(2) . . . . ? 
C19 C20 C21 C27 -159.58(17) . . . . ? 
C28 C20 C21 C27 76.3(2) . . . . ? 
C18 C19 C14 C15 -53.9(2) . . . . ? 
C20 C19 C14 C15 -177.47(16) . . . . ? 
O3 C22 C24 C25 -178.24(17) . . . . ? 
C21 C22 C24 C25 0.1(3) . . . . ? 
C22 C21 C27 C26 0.5(3) . . . . ? 
C20 C21 C27 C26 -178.98(19) . . . . ? 
C18 N2 C16 C15 57.1(2) . . . . ? 
C7 N2 C16 C15 -165.66(16) . . . . ? 
N2 C16 C15 C14 -55.6(2) . . . . ? 
C19 C14 C15 C16 55.9(2) . . . . ? 
C22 C24 C25 C26 0.7(3) . . . . ? 
C24 C25 C26 C27 -0.9(4) . . . . ? 
C21 C27 C26 C25 0.2(3) . . . . ? 
C21 C20 C28 N1 -172.34(19) . . . . ? 
C19 C20 C28 N1 64.7(2) . . . . ? 
C20 C28 N1 O2 -110.8(3) . . . . ? 
C20 C28 N1 O1 68.6(3) . . . . ? 
  
_diffrn_measured_fraction_theta_max    0.989 
_diffrn_reflns_theta_full              25.50 
_diffrn_measured_fraction_theta_full   0.989 
_refine_diff_density_max    0.194 
_refine_diff_density_min   -0.183 
_refine_diff_density_rms    0.044 
